# Supplementary material
Source: PubMed Central journal article supplement (PMC7643779)

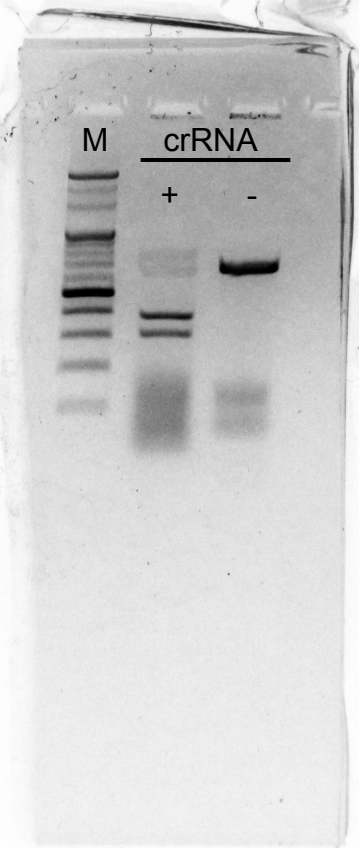

Supplement: NIHMS1624407-supplement-1.pdf [file NIHMS1624407-supplement-1.pdf]

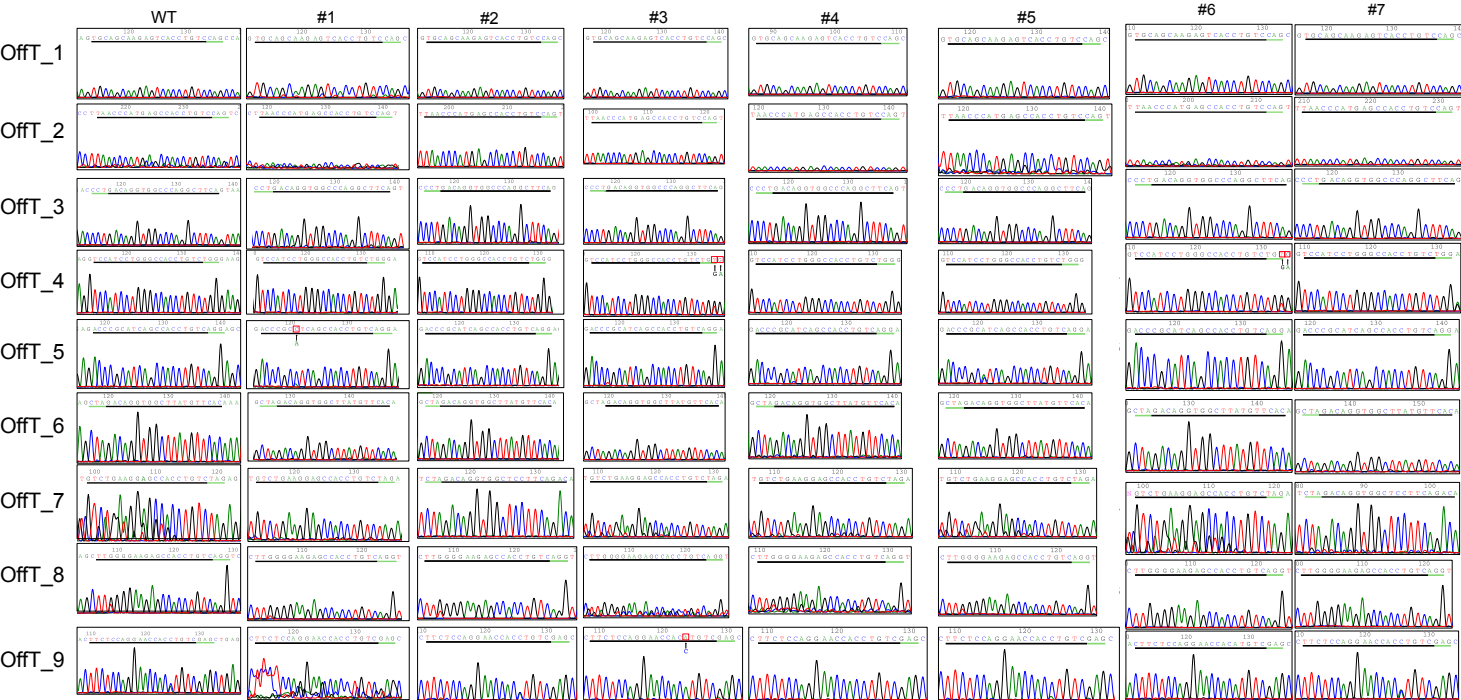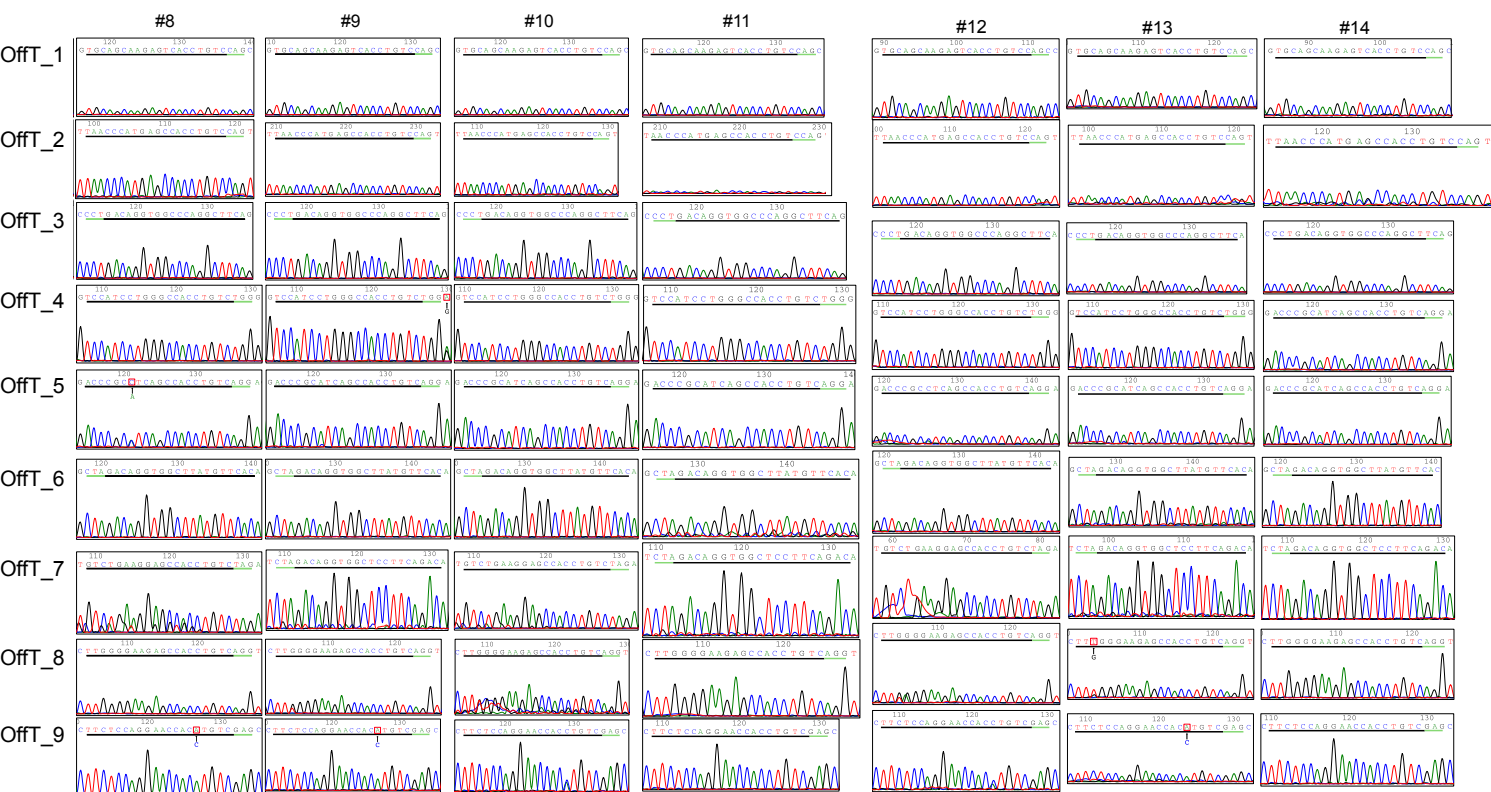

Supplement: NIHMS1624407-supplement-2.pdf [file NIHMS1624407-supplement-2.pdf]
